# Supplementary material
Source: publisher figshare collection journal article supplement (https://karger.figshare.com/ndownloader/files/22730525)
Supplement: Supplementary file 1 [file 22730525]

Supplemental material for Predictors for Augmented Renal Clearance in a Heterogeneous ICU Population as Defined by Creatinine and Cystatin C

Figure S1. **Calibration Plot.** Calibration curve depicting performance of the multivariable model for predication of augmented renal clearance (ARC).


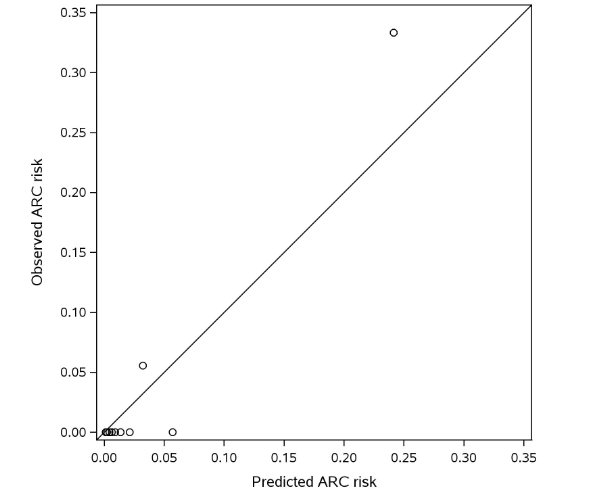


Table S1. Univariate Predictors of ARC, adjusted for BSA (defined >130 ml/min/1.73m2), n=6

| **Characteristic** | **OR (95% CI)** | **p-value** |
| --- | --- | --- |
| Charlson Comorbidity Index | 0.46(0.25-0.73) | <0.001 |
| APACHE III | 0.96(0.91-1) | 0.051 |
| TBI | 4.91(0.25-33.04) | 0.231 |
| Major Trauma | 4.82(0.65-25.59) | 0.11 |
| Intracerebral Hemorrhage | 4.59(0.23-30.73) | 0.248 |
| Age | 0.92(0.87-0.96) | <0.001 |
| SOFA Score (ICU Admit) | 0.70(0.45-0.97) | 0.028 |
| Operative Admission Diagnosis | 6.27(1-120.57) | 0.05 |
| BMI | 0.9(0.75-1.04) | 0.168 |
| Vasopressors (ICU Admit) | 0.61(0.03-3.82) | 0.632 |
| Mechanical Ventilation (ICU Admit) | 1.14(0.21-6.22) | 0.874 |
| Sepsis | 3.11(0.6-22.6) | 0.178 |
| Male Gender | 0.37(0.05-1.9) | 0.233 |
